# Supplementary figures and images for: Lysionotin promoted apoptosis of hepatocellular carcinoma cells via inducing autophagy
Source: Research Square preprint supplement (doi:10.21203/rs.3.rs-5823341/v1), 2025-05-02

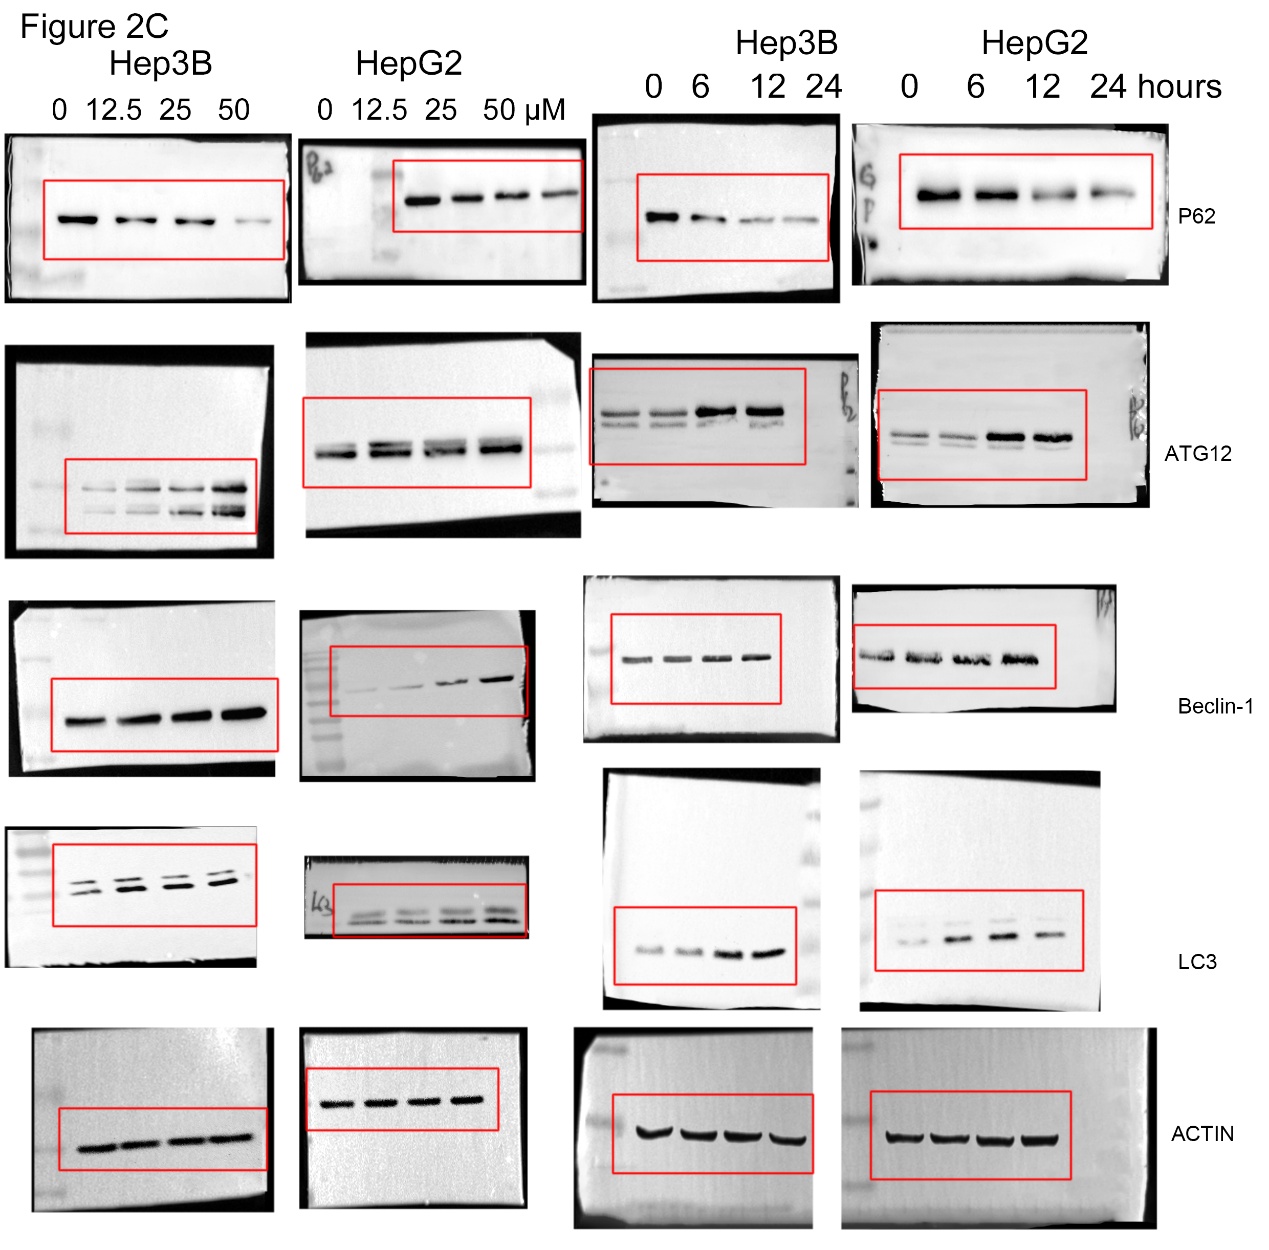

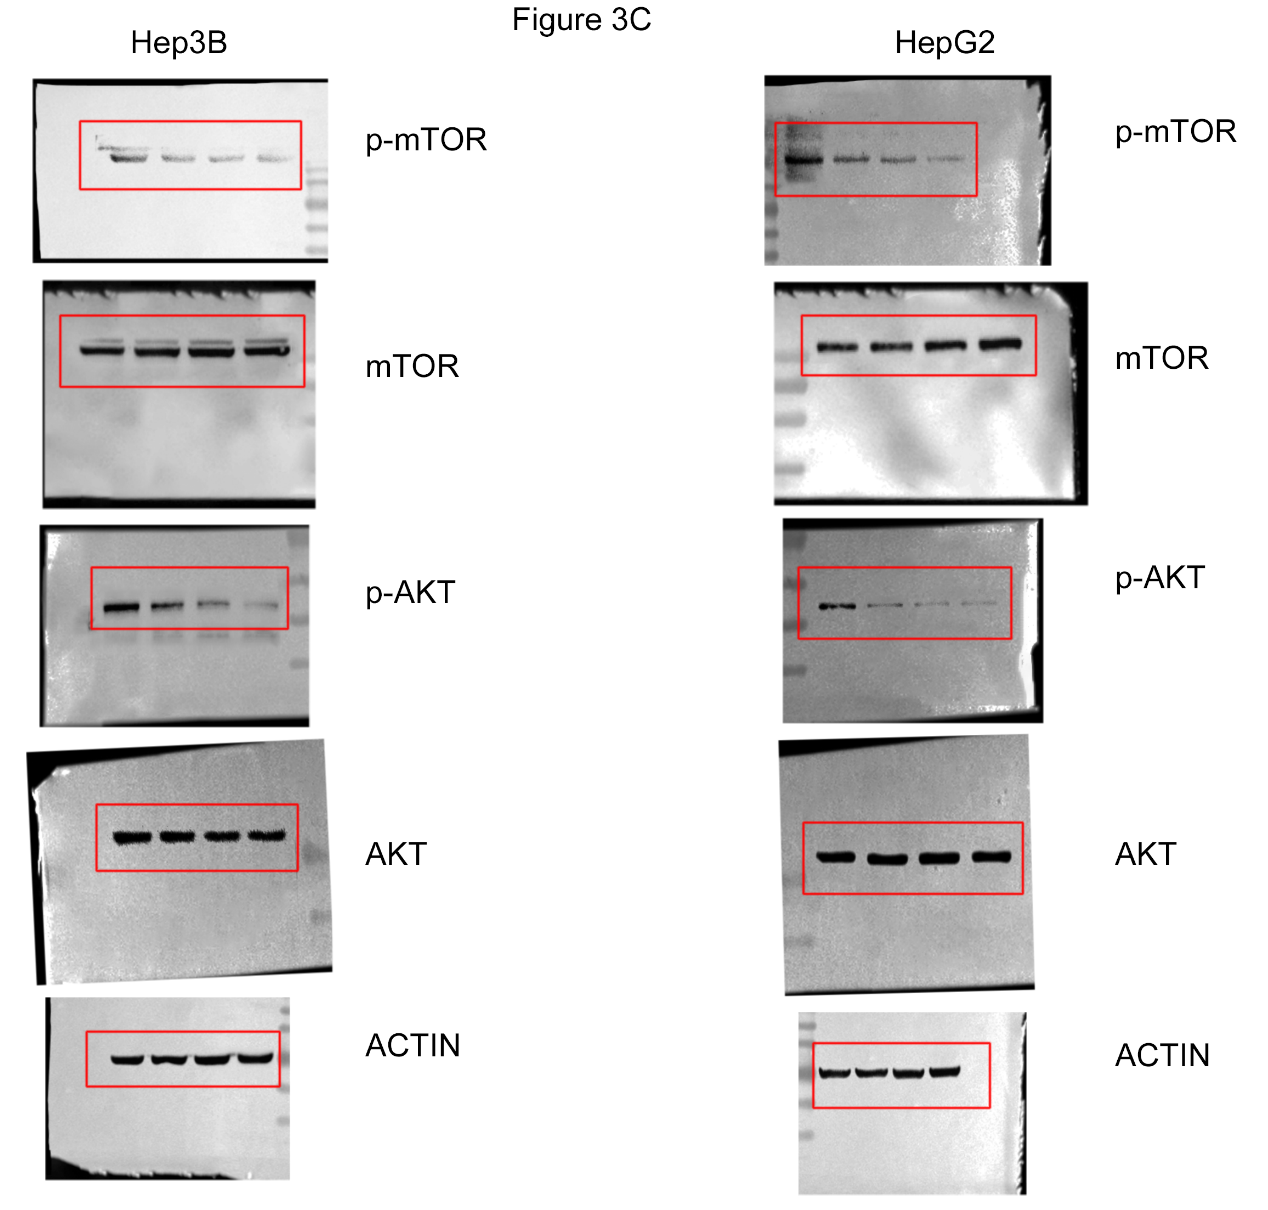

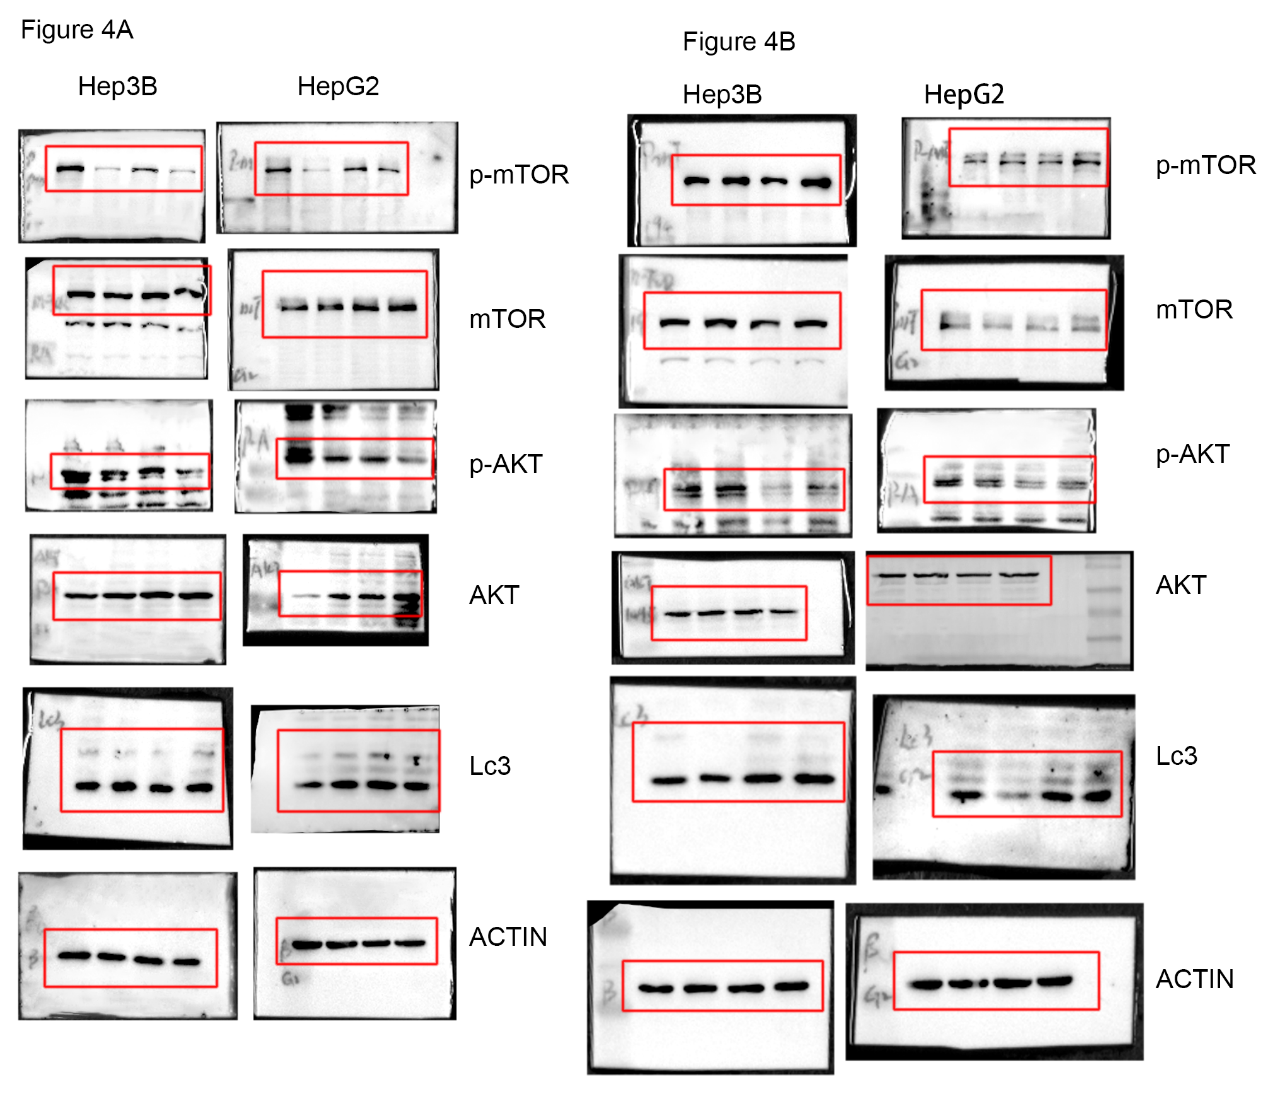

Supplement: Supplementary file 1 [file 3263b6975b8d27037db37159.docx]
